# Supplementary material for: Population genomics of Streptococcus mitis in UK and Ireland bloodstream infection and infective endocarditis cases
Source: Springer Nature journal article supplement (doi:10.1038/s41467-024-52120-z), 2024-09-06
Supplement: MOESM3 [file 41467_2024_52120_MOESM3_ESM.pdf]

## **Description of Additional Supplementary Files**

**Supplementary Data 1:** *Streptococcus mitis* isolates and metadata obtained from the UK Health Security Agency

**Supplementary Data 2:** *Streptococcus mitis* isolates and metadata obtained from the UK Health Security Agency

**Supplementary Data 3:** *Streptococcus mitis* virulence gene assessment

**Supplementary Data 4:** *Streptococcus pneumoniae* genome accession numbers and metadata

**Supplementary Data 5:** *Streptococcus mitis* genome assembly quality assessment

**Supplementary Data 6:** *Streptococcus mitis* reference genome accession numbers

**Supplementary Data 7:** *Streptococcus mitis* genome accession numbers
